# Supplementary material
Source: publisher figshare collection journal article supplement (https://acs.figshare.com/ndownloader/files/3852166)
Supplement: Supplementary file 1 [file 3852166]

## Supporting Information

### Multiferroic Grain Boundaries in Oxygen-Deficient Ferroelectric Lead Titanate

Takahiro Shimada,<sup>1,2,\*</sup> Jie Wang,<sup>1,3</sup> Taku Ueda,<sup>1</sup> Yoshitaka Uratani,<sup>1</sup> Kou Arisue,<sup>1</sup> Matous Mrovec,<sup>2</sup>  
Christian Elsässer,<sup>2</sup> and Takayuki Kitamura<sup>1</sup>

<sup>1</sup> *Department of Mechanical Engineering and Science, Kyoto University,  
Nishikyo-ku, Kyoto 615-8540, Japan*

<sup>2</sup> *Fraunhofer Institute for Mechanics of Materials IWM, Wöhlerstraße 11, 79108 Freiburg, Germany*

<sup>3</sup> *Department of Engineering Mechanics, School of Aeronautics and Astronautics,  
Zhejiang University, Hangzhou 310027, China*

---

\* E-mail: shimada@me.kyoto-u.ac.jp

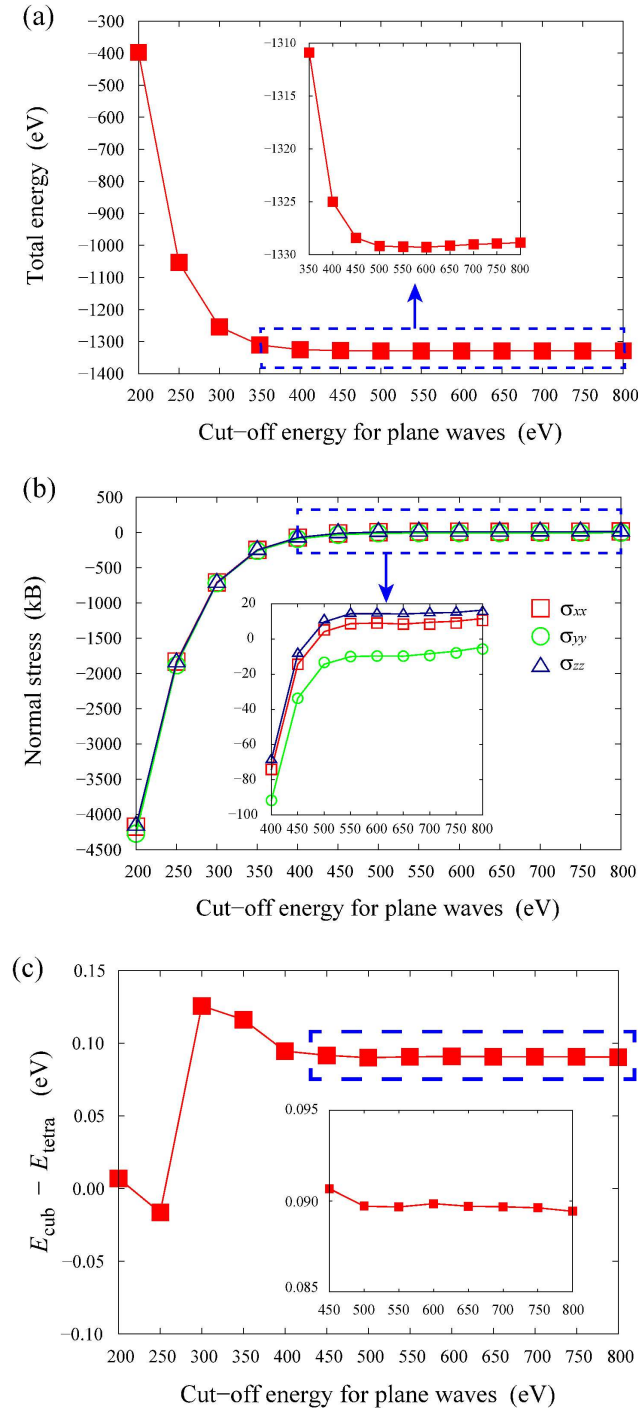

**Supporting Figure S1.** (a) Total energy and (b) stresses for the simulation supercell used in the present study, and (c) the energy difference between paraelectric and ferroelectric phases as a function of cut-off energy of plane waves. Both the total energy and stresses sufficiently converges when the cut-off energy is equal to or more than 500 eV.

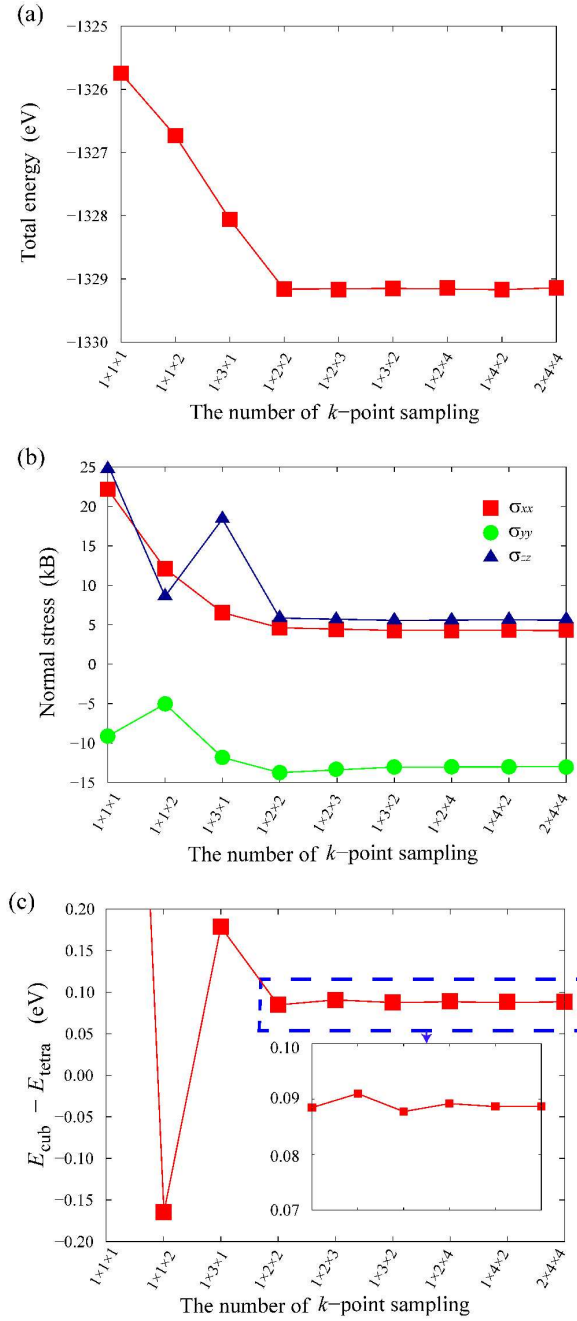

**Supporting Figure S2.** (a) Total energy and (b) stresses for the simulation supercell used in the present study, and (c) the energy difference between paraelectric and ferroelectric phases as a function of number of  $k$ -points. Both the total energy and stresses sufficiently converges when the  $k$ -point mesh is equal to or denser than  $1 \times 2 \times 2$ . The half reduction is used for the exact exchange portion of the exchange-correlation functional when the mesh division number is even, but the effect of this treatment does not appreciably change the results, e.g., less than 0.01 eV for the total energy.

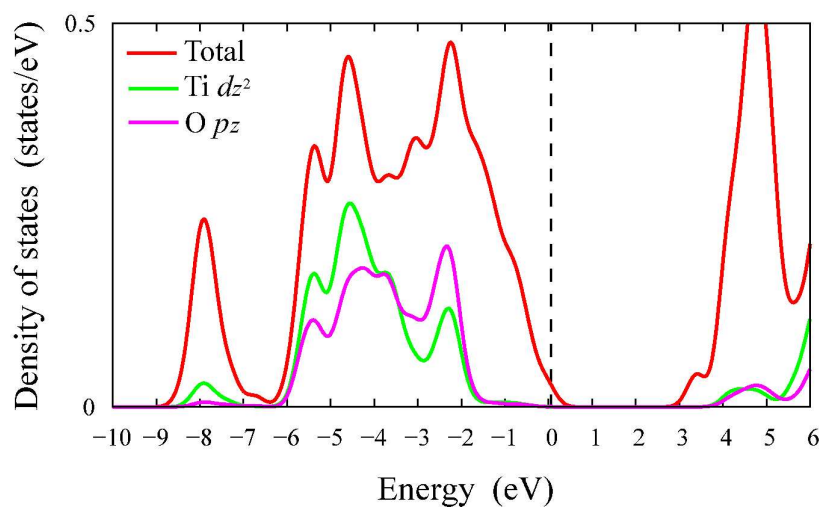

**Supporting Figure S3.** Total and atom-resolved angular-momentum-projected density of states (DOS) for ferroelectric  $\text{PbTiO}_3$  bulk. The projected DOS of  $\text{Ti } d_{z^2}$  and  $\text{O1 } p_z$  orbitals are overlapped from the energy levels of  $-6$  eV to  $-2$  eV, which indicates the hybridization of these orbitals in  $\text{PbTiO}_3$ . The vertical dashed line indicates the Fermi level.
